# Supplementary material for: Photo-controlled exchange bias in CoO@Co–Fe PBA core–shell heterostructures
Source: Royal Society of Chemistry journal article supplement (doi:10.1039/d1tc04562h), 2021-11-23
Supplement: d1tc04562h1.pdf [file d1tc04562h1.pdf]

# Journal Name

## ARTICLE TYPE

Cite this: DOI: 00.0000/xxxxxxxxxx

## Support Information †

Kangkang Yao,<sup>a</sup> Jianing Li,<sup>a</sup> Shuang Yuan,<sup>b</sup> Kaiyan Cao,<sup>a</sup> Fang Wang,<sup>c</sup> Yin Zhang,<sup>\*a</sup> Fanghua Tian,<sup>a</sup> Jinwen Wang,<sup>a</sup> Qiang Wang,<sup>b</sup> and Sen Yang,<sup>\*a</sup>

Received Date  
Accepted Date

DOI: 00.0000/xxxxxxxxxx

*yzhang18@xjtu.edu.cn; yang.sen@xjtu.edu.cn*

<sup>b</sup> *Department of New Energy Science & Engineering, School of Metallurgy, Northeastern University, Shenyang 110819, China.*

<sup>c</sup> *Key Laboratory of Magnetic Molecules and Magnetic Information Materials, Ministry of Education, Linfen 041004, China.*

\* Corresponding authors.

---

<sup>a</sup> *School of physics, MOE Key Laboratory for Nonequilibrium Synthesis and Modulation of Condensed Matter, Xi'an Jiaotong University, Xi'an 710049, China; E-mail:*

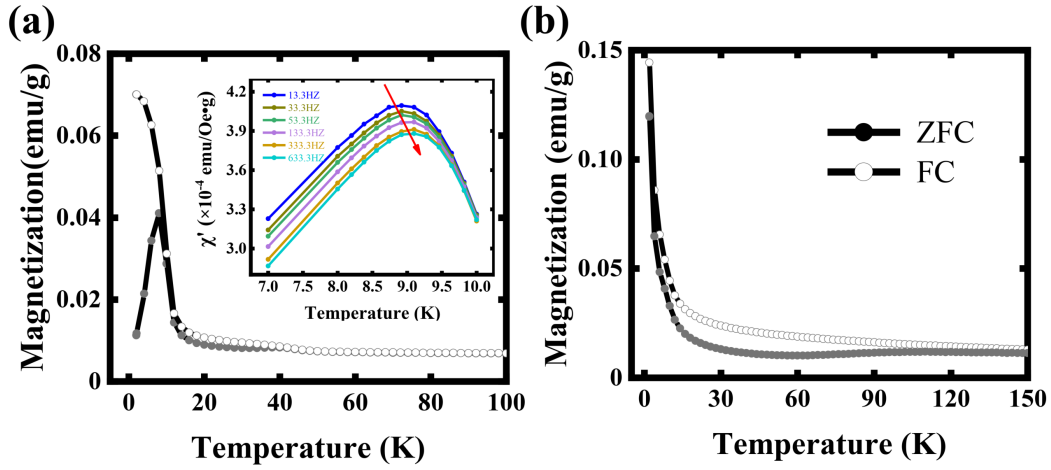

Fig. S1 M-T curves for (a) CoO precursor (b) CoO@CoFe-PBA. The solid circle and the hollow circle represent the results of ZFC and FC respectively. And the inset in (a) is the temperature dependence of the real part of the AC susceptibility for the CoO precursor measured at frequencies of 13.3, 33.3, 53.3, 133.3, 333.3, and 633.3 Hz after ZFC from 300 K.

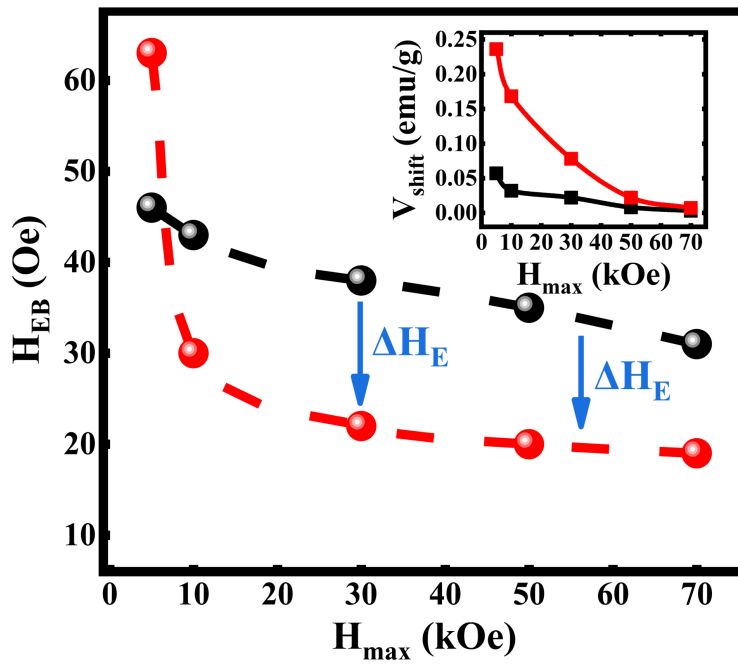

Fig. S2 The dependence of  $H_{EB}$  before and after light irradiation on the maximum applied field ( $H_{max}$ ). The inset shows the vertical shift ( $V_{shift}$ ) of the hysteresis loop before and after red light irradiation corresponding to a series of  $H_{max}$ .

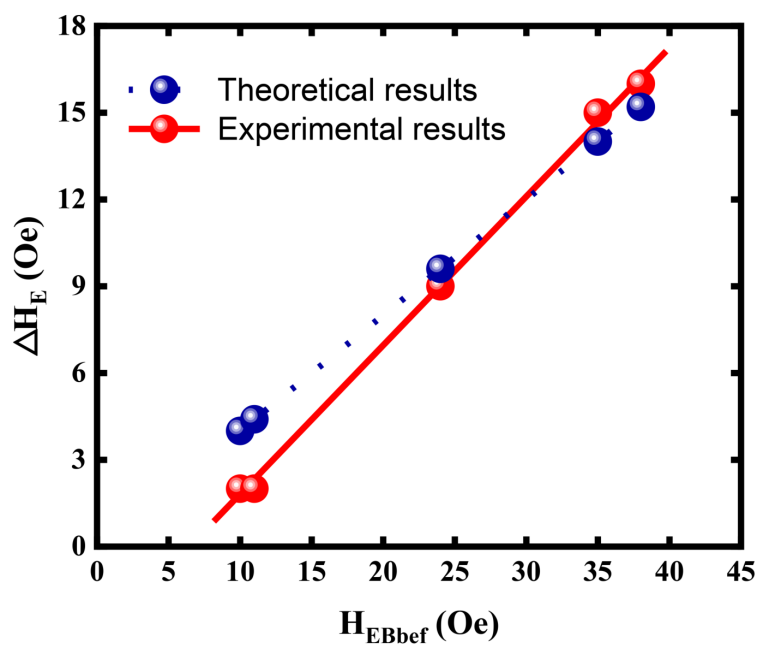

Fig. S3 The dependence of  $\Delta H_E$  on  $H_{EBbef}$ . The  $\Delta H_E$  measured in this work are plotted as red dots. The theoretical value of  $\Delta H_E$  calculated by equation 2 with  $H_{EBbef}$  as the independent variable is shown as purple dots.
